# Supplementary material
Source: PubMed Central journal article supplement (PMC3974834)
Supplement: cbt-15-329-s01.pdf [file cbt-15-329-s01.pdf]

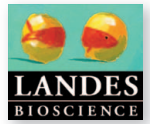

## **Supplemental Material to:**

**Banumathy Gowrishankar, Ilsiya Ibragimova, Yan Zhou,  
Michael J Slifker, Karthik Devarajan, Tahseen Al-Saleem,  
Robert G Uzzo, and Paul Cairns**

**MicroRNA expression signatures of stage, grade,  
and progression in clear cell RCC**

**Cancer Biology & Therapy 2014; 15(3)  
<http://dx.doi.org/10.4161/cbt.27314>**

**<http://www.landesbioscience.com/journals/cbt/article/27314/>**

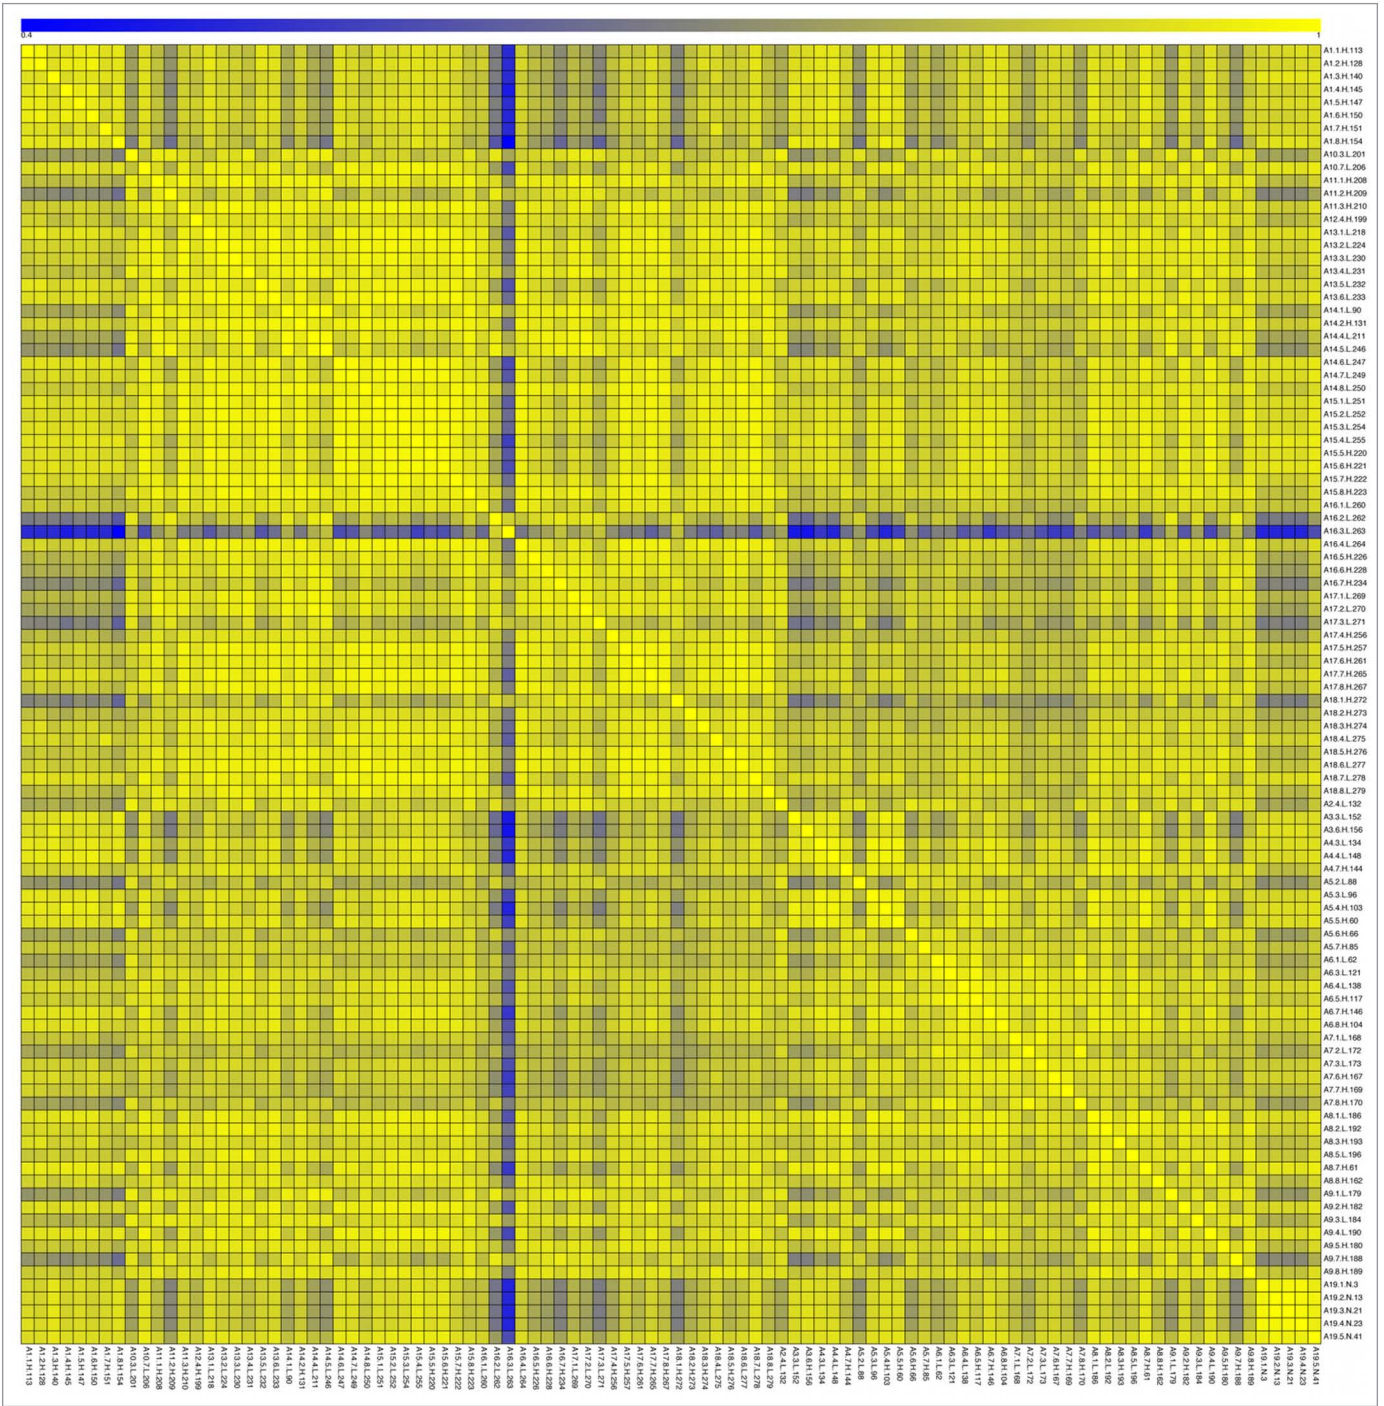

**Figure S1.** Correlation heat map showing the Pearson coefficient of each sample against itself or every other sample in the microarray. The Pearson coefficient ranges between 0.7 and 1.0.

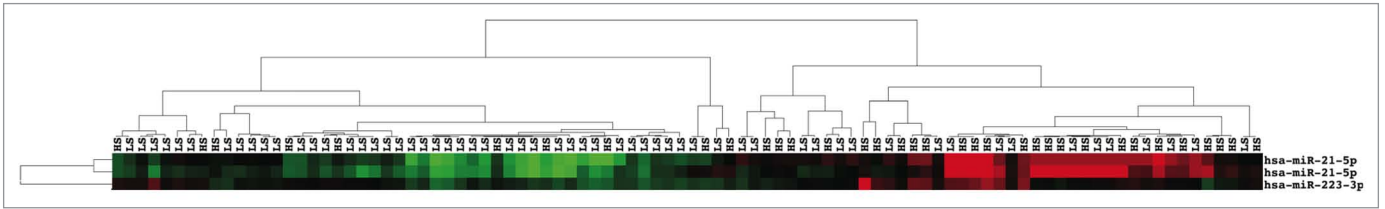

**Figure S2.** Clustering analysis by clinical stage. Unsupervised two-dimensional hierarchical clustering with a data matrix of 3 probes in 94 ccRCC (59 LS and 35 HS).

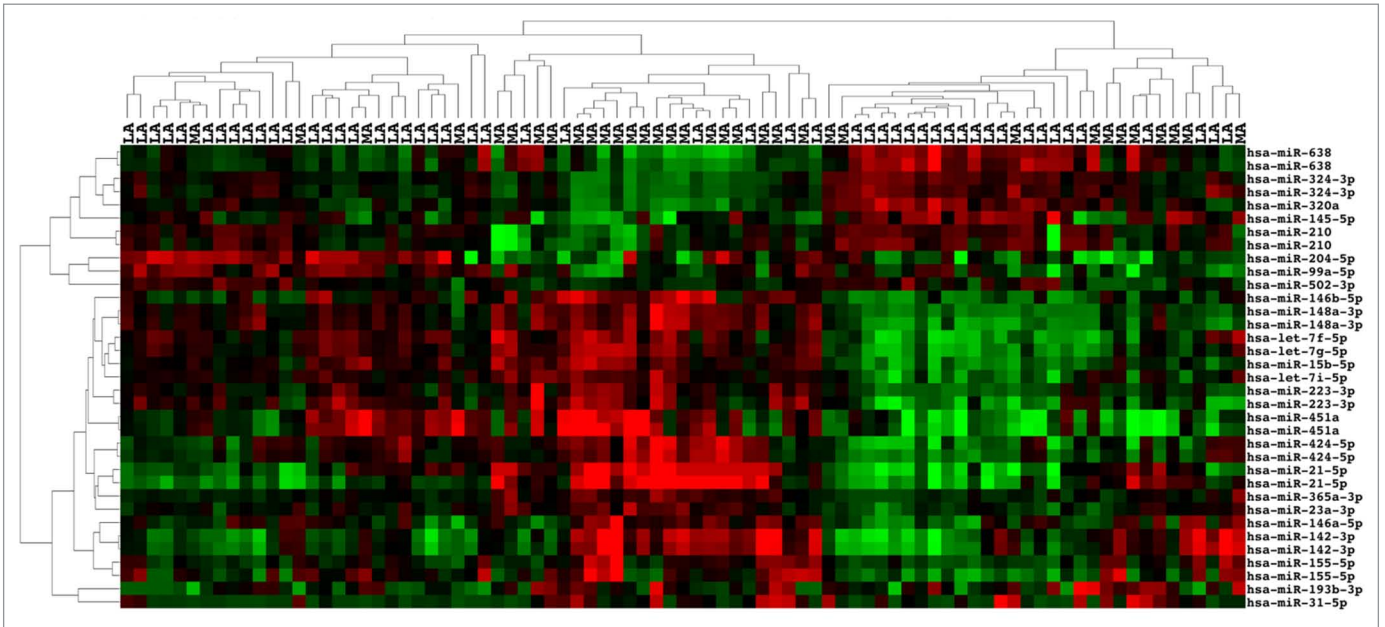

**Figure S3.** Clustering analysis by aggressiveness. Unsupervised two-dimensional hierarchical clustering with a data matrix of 35 probes in 85 ccRCC (51 LA and 34 MA).



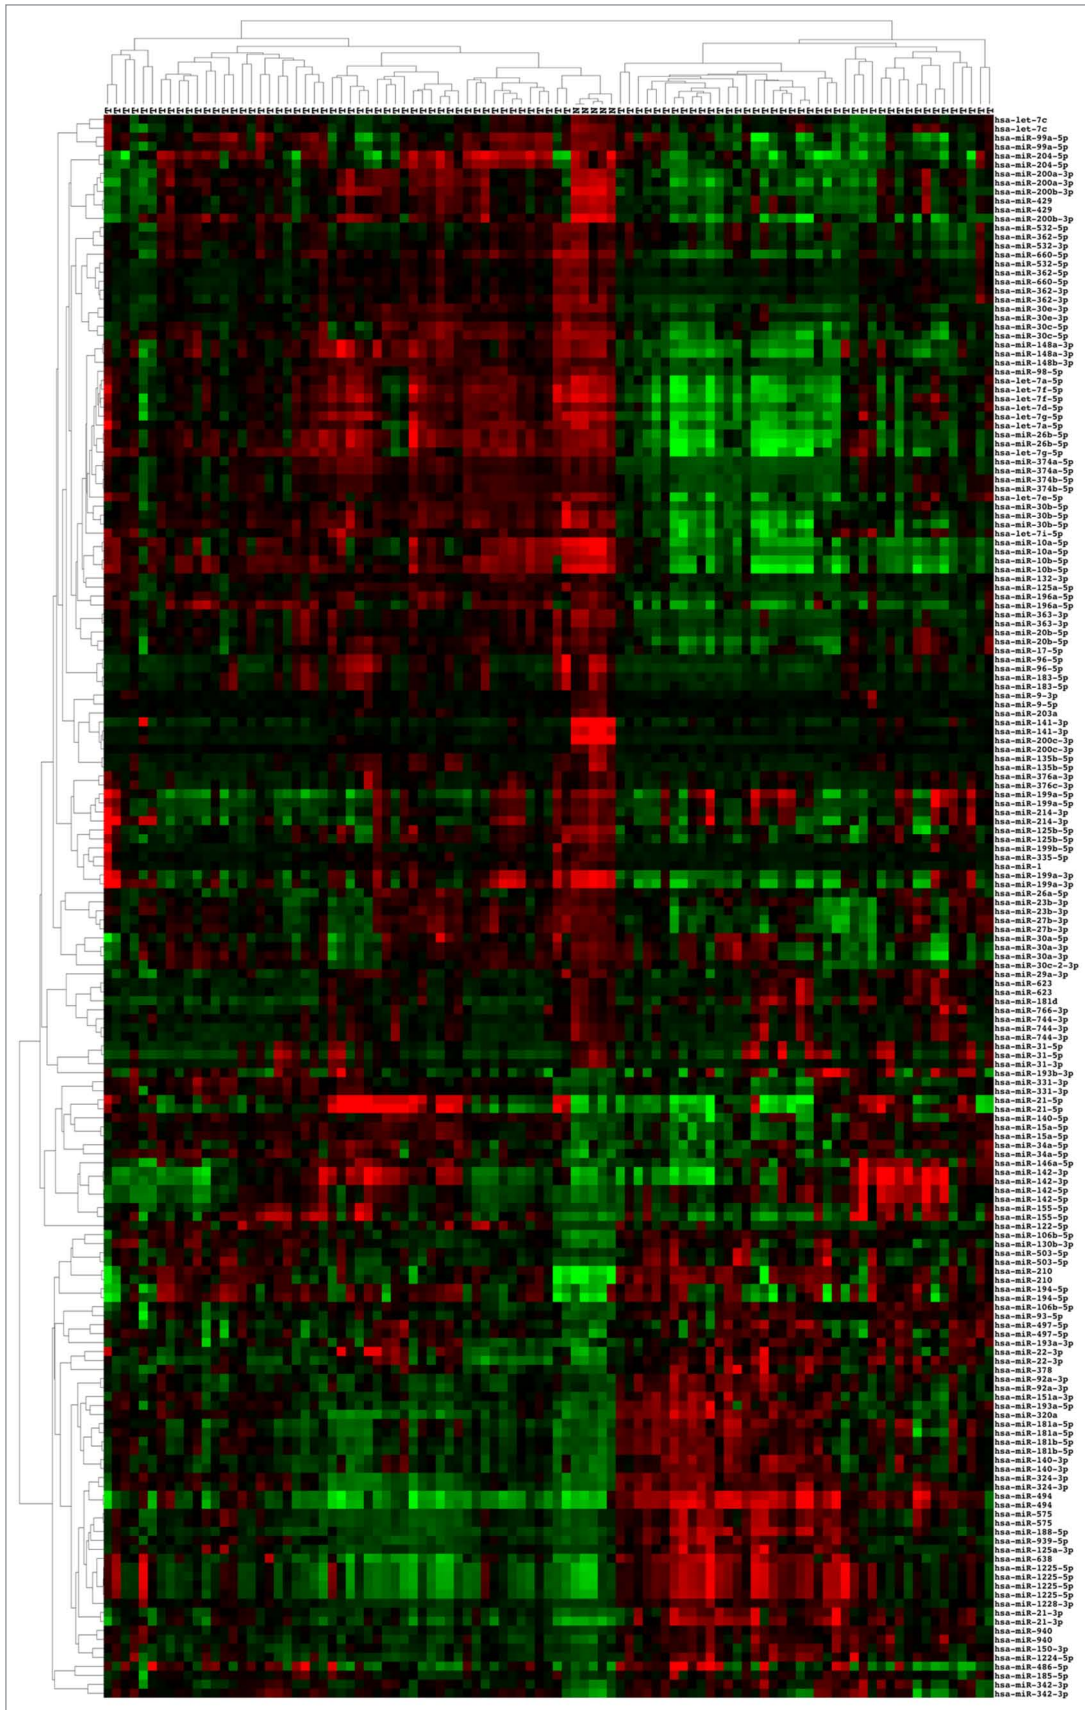

**Figure S4.** Differences in miRNA expression between ccRCC and normal renal parenchyma. Unsupervised two-dimensional hierarchical clustering with a data matrix of 176 probes in 99 renal samples (94 ccRCC and 5 NRP).

For **Tables S1–S11**, please visit [www.landesbioscience.com/journals/cbt/article/27314](http://www.landesbioscience.com/journals/cbt/article/27314) and download the file named Tables S1–S11.

**Table S1.** miRNA expression data and statistical analysis: Typical high grade high stage (29) vs. low grade low stage (29)

**Table S2.** miRNA expression data and statistical analysis: High stage annotated (35) vs. low stage annotated (46)

**Table S3.** miRNA expression data and statistical analysis: High stage (35) vs. low stage (59)

**Table S4.** miRNA expression data and statistical analysis: High grade (50) vs. low grade (44)

**Table S5.** miRNA expression data and statistical analysis: Grade IV (16) vs. grade I (7)

**Table S6.** miRNA expression data and statistical analysis: Low stage high grade (21) vs. low stage low grade (38)

**Table S7.** miRNA expression data and statistical analysis: Progression (19) vs. no progression (51)

**Table S8.** miRNA expression data and statistical analysis: More aggressive (43) vs. less aggressive (51)

**Table S9.** miRNA expression data and statistical analysis: Metastatic (34) vs. non-metastatic (51)

**Table S10.** miRNA expression data and statistical analysis: Tumor (94) vs. normal (5)

**Table S11.** DIANA mirpath analysis. List of KEGG pathways significantly ( $P < 0.05$ ) overrepresented as targets of the set of dysregulated miRNAs (**A**) in subsets of ccRCC and (**B**) in ccRCC compared to NRP.
